# Supplementary material for: The Impact of Anti-Müllerian Hormone on Pregnancy Loss in Fresh and Frozen-thawed Embryo Transfer Cycles: A Retrospective Cohort Study
Source: Research Square preprint supplement (doi:10.21203/rs.3.rs-8159682/v1), 2025-12-16
Supplement: Supplementary file 1 [file 5d906909a37cf346401ec752.docx]

**Supplementary Files**

**Supplementary table 1 Baseline characteristics, relevant IVF-ET data and pregnancy outcomes of patients age ≥35**

| **Characteristics** | **Group 5‡**  **(N=518)** | **Group 6‡**  **(N=1149)** | **χ2/Z *value*** | ***P value*** |
| --- | --- | --- | --- | --- |
| Age, median (IQR*), year | 37.00  (36.00, 39.00) | 37.00  (35.00, 39.00) | 4.2 | ＜0.001 |
| BMI*, median (IQR), kg/m2 | 22.30  (20.30, 24.65) | 22.40  (20.30, 24.70) | 0.01 | 0.995 |
| Primary Infertility, percentage(No./N) | 45.9 (238/518) | 46.6 (536/1149) | 0.05 | 0.831 |
| Infertile duration, median (IQR) | 3 (2, 7) | 4 (2, 7) | -0.33 | 0.745 |
| No. of parity, median (IQR), times | 1 (0, 1) | 0 (0, 1) | 0.79 | 0.432 |
| No. of gravidity,  median (IQR), times | 0 (0, 0) | 0 (0, 0) | -1.48 | 0.139 |
| FSH*, median (IQR), (U/L) | 7.97  (6.11, 10.50) | 6.66  (5.30, 8.10) | 8.59 | ＜0.001 |
| No. of AFC*, median (IQR) | 5 (4, 7) | 8 (6, 11) | -17.13 | ＜0.001 |
| Fallopian tube factors, percentage(No./N) | 29.7 (154/518) | 39.0 (448/1149) | 12.87 | ＜0.001 |
| Endometriosis, percentage(No./N) | 9.5 (49/518) | 9.6 (110/1149) | ＜0.01 | 1 |
| Male factors, percentage(No./N) | 47.9 (248/518) | 50.3 (578/1149) | 0.75 | 0.387 |
| Thyroid disease, percentage(No./N) | 1.5 (8/518) | 3.0 (35/1149) | 3.2 | 0.073 |
| Uterine Fibroid, percentage(No./N) | 14.1 (73/518) | 11.8 (136/1149) | 1.66 | 0.198 |
| Failure of IVF*, percentage(No./N) | 36.7 (190/518) | 28.1 (323/1149) | 11.91 | 0.001 |
| Protocol of COS*, percentage(No./N) |  |  | 65.35 | ＜0.001 |
| Ultralong protocol | 10.8 (56/518) | 19.0 (218/1149) |  |  |
| Long GnRH* agonist, | 20.5 (106/518) | 29.5 (339/1149) | |  |
| GnRH agonist | 60.2 (312/518) | 49.2 (565/1149) |  |  |
| Others**†** | 8.5 (44/518) | 2.3 (27/1149) |  |  |
| Gn* dosage, median (IQR), U | 3450  (2625, 4350) | 3075  (2325, 3844) | 6.11 | ＜0.001 |
| Gn duration, median (IQR), day | 11 (9, 13) | 11 (10, 13) | -2.46 | 0.014 |
| ICSI*,percentage(No./N) | 26.1 (135/518) | 31.5 (362/1149) | 4.8 | 0.028 |
| Cleavage stage embryo, percentage(No./N) | 28.8 (149/518) | 16.9 (194/1149) | 34.15 | ＜0.001 |
| Blastocysts, percentage(No./N) | 3.3 (17/518) | 6.2 (71/1149) | 5.68 | 0.017 |
| Miscarriage, percentage(No./N) | 30.9 (160/518) | 28.5 (327/1149) | 0.9 | 0.342 |
| Early Miscarriage, percentage(No./N) | 26.3 (136/518) | 23.2 (266/1149) | 1.71 | 0.19 |
| Late Miscarriage,  percentage(No./N) | 4.6 (24/518) | 5.3 (61/1149) | 0.21 | 0.645 |

*Abbreviations: IQR, interquartile range; BMI, body mass index; FSH, follicle-stimulating hormone; AFC, antral follicle counting; IVF, in vitro fertilization; COS, controlled ovarian stimulation; GnRH, gonadotropin-releasing hormone; Gn, gonadotropin; ICSI, intracytoplasmic sperm injection

**†**Others include the short protocol, the micro-stimulation protocol and the luteal-phase ovulation induction protocol

**‡**Group 5: women aged ≥35 with low level of AMH (＜1.00 ng/ml) and following fresh embryo transfer

Group 6: women aged ≥35 with normal level of AMH (≥1.00 ng/ml) and following fresh embryo transfer

**Supplementary table 2 Baseline characteristics, relevant IVF-ET data and pregnancy outcomes of patients age ＜ 35**

| **Characteristic** | **Group 7‡**  **(N=499)** | **Group 8‡**  **(N=2816)** | ***χ2/Z value*** | ***P value*** |
| --- | --- | --- | --- | --- |
| Age, median (IQR*), year | 31.00  (30.00, 33.00) | 31.00  (29.00, 32.00) | 5.88 | ＜0.001 |
| BMI*, median (IQR), kg/m2 | 22.00  (20.20, 24.50) | 21.70  (20.00, 24.20) | 2.21 | 0.027 |
| Primary Infertility, percentage(No./N) | 63.5 (317/499) | 63.9 (1800/2816) | 0.01 | 0.906 |
| Infertile duration, median (IQR) | 3 (2, 5) | 3 (2, 4) | 2.75 | 0.006 |
| No. of parity, median (IQR), times | 0 (0, 1) | 0 (0, 1) | -0.42 | 0.672 |
| No. of gravidity,  median (IQR), times | 0 (0, 0) | 0 (0, 0) | 0.11 | 0.914 |
| FSH*, median (IQR), (U/L) | 7.57 (5.80, 9.70) | 6.42 (5.22, 7.82) | 8.39 | ＜0.001 |
| No. of AFC*, median (IQR) | 6 (4, 8) | 11 (8, 14) | -20.51 | ＜0.001 |
| Fallopian tube factors, percentage(No./N) | 34.5 (172/499) | 39.8 (1122/2816) | 4.92 | 0.027 |
| Endometriosis, percentage(No./N) | 14.6 (73/499) | 8.1 (229/2816) | 20.83 | ＜0.001 |
| Male factors, percentage(No./N) | 50.3 (251/499) | 55.9 (1575/2816) | 5.21 | 0.023 |
| Thyroid disease, percentage(No./N) | 2.2 (11/499) | 1.7 (48/2816) | 0.61 | 0.436 |
| Uterine Fibroid, percentage(No./N) | 6.8 (34/499) | 4.9 (139/2816) | 3.02 | 0.082 |
| Failure of IVF*, percentage(No./N) | 24.0 (120/499) | 16.5 (465/2816) | 16.05 | ＜0.001 |
| Protocol of COS*, percentage(No./N) |  |  | 65.49 | ＜0.001 |
| Ultralong protocol | 12.8 (64/499) | 16.1 (453/2816) |  |  |
| Long GnRH* agonist | 26.7 (133/499) | 29.4 (827/2816) |  |  |
| GnRH agonist | 53.7 (268/499) | 53.3 (1500/2816) |  |  |
| Others**†** | 6.8 (34/499) | 1.3 (36/2816) |  |  |
| Gn* dosage, median (IQR), U | 3375  (2550, 4350) | 2450  (1800, 3150) | 15.47 | ＜0.001 |
| Gn duration, median (IQR), day | 11 (9, 13) | 11 (10, 13) | -0.35 | 0.726 |
| ICSI*, percentage(No./N) | 30.9 (154/499) | 40.9 (1152/2816) | 17.92 | ＜0.001 |
| Cleavage stage embryo, percentage(No./N) | 19.8 (99/499) | 12.4 (349/2816) | 20.11 | ＜0.001 |
| Blastocysts, percentage(No./N) | 3.2 (16/499) | 6.4 (179/2816) | 7.1 | 0.008 |
| Miscarriage, percentage(No./N) | 20.8 (104/499) | 15.4 (433/2816) | 8.93 | 0.003 |
| Early Miscarriage, percentage(No./N) | 17.4 (87/499) | 12.5 (352/2816) | 8.56 | 0.003 |
| Late Miscarriage,  percentage(No./N) | 3.4 (17/499) | 2.8 (80/2816) | 0.3 | 0.584 |

*Abbreviations: IQR, interquartile range; BMI, body mass index; FSH, follicle-stimulating hormone; AFC, antral follicle counting; IVF, in vitro fertilization; COS, controlled ovarian stimulation; GnRH, gonadotropin-releasing hormone; Gn, gonadotropin; ICSI, intracytoplasmic sperm injection

**†**Others include the short protocol, the micro-stimulation protocol and the luteal-phase ovulation induction protocol

**‡**Group 7: women aged ＜35 with low level of AMH (＜1.00 ng/ml) and following fresh embryo transfer

Group 8: women aged ＜35 with normal level of AMH (≥1.00 ng/ml) and following fresh embryo transfer

**Supplementary table 3 Baseline characteristics, relevant IVF-FET data and pregnancy outcomes of patients age ≥35**

| **Characteristic** | **Group 9‡**  **(N=229)** | **Group 10‡**  **(N=1263)** | ***χ2/Z***  ***value*** | ***P value*** |
| --- | --- | --- | --- | --- |
| Age, median (IQR*), year | 37.00  (36.00, 39.00) | 37.00  (35.00, 38.00) | 4.91 | ＜0.001 |
| BMI*, median (IQR), kg/m2 | 22.00  (20.20, 24.25) | 22.10  (20.20, 24.20) | -0.38 | 0.707 |
| Primary Infertility, percentage(No./N) | 46.3 (106/229) | 48.9 (618/1263) | 0.59 | 0.442 |
| Infertile duration, median (IQR) | 4 (2, 7) | 4 (2, 8) | 0.7 | 0.486 |
| No. of parity, median (IQR), times | 0 (0, 1) | 1 (0, 1) | -0.16 | 0.873 |
| No. of gravidity,  median (IQR), times | 0 (0, 0) | 0 (0, 0) | -0.28 | 0.78 |
| FSH*, median (IQR), (U/L) | 7.83 (6.06, 9.90) | 6.38 (5.19, 7.64) | 6.93 | ＜0.001 |
| No. of AFC*, median (IQR) | 6 (3, 8) | 10 (7, 13) | -12.57 | ＜0.001 |
| Fallopian tube factors, percentage(No./N) | 35.8 (82/229) | 43.8 (553/1263) | 4.73 | 0.030 |
| Endometriosis, percentage(No./N) | 13.5 (31/229) | 8.0 (101/1263) | 6.71 | 0.010 |
| Male factors, percentage(No./N) | 50.2 (115/229) | 56.4 (712/1263) | 2.73 | 0.099 |
| Thyroid disease, percentage(No./N) | 1.3 (3/229) | 2.2 (28/1263) | 0.78 | 0.376 |
| Uterine Fibroid, percentage(No./N) | 11.4 (26/229) | 12.4 (157/1263) | 0.21 | 0.648 |
| Failure of IVF*, percentage(No./N) | 34.5 (79/229) | 24.6 (311/1263) | 9.28 | 0.002 |
| Protocol of COS*, percentage(No./N) |  |  | 40.92 | ＜0.001 |
| Ultralong protocol | 7.0 (16/229) | 13.5 (171/1263) |  |  |
| Long GnRH* agonist | 20.1 (46/229) | 29.0 (366/1263) | |  |
| GnRH agonist | 65.1 (149/229) | 55.7 (703/1263) |  |  |
| Others**†** | 7.9 (18/229) | 1.8 (23/1263) |  |  |
| Gn* dosage, median (IQR), U | 3225  (2475, 3975) | 2700  (2025, 3375) | 5.89 | ＜0.001 |
| Gn duration, median (IQR), day | 11 (9, 12) | 11 (10, 12) | -2.56 | 0.010 |
| Protocol of Endometrial Preparation,  percentage(No./N) |  |  | 5.35 | 0.069 |
| Natural cycle | 66.8 (153/229) | 59.5 (751/1263) |  |  |
| Artificial cycle | 23.6 (54/229) | 31.0 (392/1263) |  |  |
| Ovarian stimulation cycle | 9.6 (22/229) | 9.3 (117/1263) |  |  |
| ICSI*,percentage(No./N) | 25.7 (59/229) | 40.7 (514/1263) | 18.28 | ＜0.001 |
| Cleavage stage embryo, percentage(No./N) | 77.3 (177/229) | 69.4 (877/1263) | 5.77 | 0.016 |
| Blastocysts, percentage(No./N) | 77.7 (178/229) | 68.6 (866/1263) | 7.32 | 0.007 |
| Miscarriage, percentage(No./N) | 30.6 (70/229) | 26.4 (334/1263) | 1.47 | 0.226 |
| Early Miscarriage, percentage(No./N) | 27.1 (62/229) | 23.1 (292/1263) | 1.46 | 0.226 |
| Late Miscarriage,  percentage(No./N) | 3.5 (8/229) | 3.3 (42/1263) | ＜0.01 | 1 |

*Abbreviations: IQR, interquartile range; BMI, body mass index; FSH, follicle-stimulating hormone; AFC, antral follicle counting; IVF, in vitro fertilization; COS, controlled ovarian stimulation; GnRH, gonadotropin-releasing hormone; Gn, gonadotropin; ICSI, intracytoplasmic sperm injection

**†**Others include the short protocol, the micro-stimulation protocol and the luteal-phase ovulation induction protocol

**‡**Group 9: women aged ≥35 with low level of AMH (＜1.00 ng/ml) and following frozen-thawed embryo transfer

Group 10: women aged ≥35 with normal level of AMH (≥1.00 ng/ml) and following frozen-thawed embryo transfer

**Supplementary table 4 Baseline characteristics, relevant IVF-FET data and pregnancy outcomes of patients age ＜35**

| **Characteristics** | **Group 11‡**  **(N=257)** | **Group 12‡**  **(N=3529)** | **χ2/Z *value*** | ***P value*** |
| --- | --- | --- | --- | --- |
| Age, median (IQR*), year | 31.00  (29.00, 33.00) | 30.00  (28.00, 32.00) | 5.43 | ＜0.001 |
| BMI*, median (IQR), kg/m2 | 21.50  (20.00, 24.50) | 21.50  (19.70, 23.70) | 2.31 | 0.021 |
| Primary Infertility, percentage(No./N) | 68.9 (177/257) | 65.8 (2323/3529) | 0.76 | 0.383 |
| Infertile duration, median (IQR) | 3 (2, 5) | 3 (2, 5) | 0.43 | 0.669 |
| No. of parity, median (IQR), times | 0 (0, 1) | 0 (0, 1) | -1.81 | 0.07 |
| No. of gravidity,  median (IQR), times | 0 (0, 0) | 0 (0, 0) | -0.95 | 0.343 |
| FSH*, median (IQR), (U/L) | 7.42  (5.35, 9.38) | 6.13  (4.99, 7.32) | 6.86 | ＜0.001 |
| No. of AFC*, median (IQR) | 6 (4, 9) | 12 (9, 15) | -16.76 | ＜0.001 |
| Fallopian tube factors, percentage(No./N) | 37.7 (97/257) | 44.8 (1581/3529) | 4.55 | 0.033 |
| Endometriosis, percentage(No./N) | 14.4 (37/257) | 8.2 (288/3529) | 11.09 | 0.001 |
| Male factors, percentage(No./N) | 54.5 (140/257) | 59.8 (2111/3529) | 2.62 | 0.105 |
| Thyroid disease, percentage(No./N) | 2.3 (6/257) | 1.9 (68/3529) | 0.21 | 0.648 |
| Uterine Fibroid, percentage(No./N) | 5.8 (15/257) | 4.3 (150/3529) | 1.45 | 0.229 |
| Failure of IVF*, percentage(No./N) | 27.2 (70/257) | 14.7 (519/3529) | 27.69 | ＜0.001 |
| Protocol of COS*, percentage(No./N) |  |  | 61.58 | ＜0.001 |
| Ultralong protocol | 6.6 (17/257) | 11.2 (397/3529) |  |  |
| Long GnRH* agonist | 23.0 (59/257) | 27.8 (981/3529) | |  |
| GnRH agonist | 63.0 (162/257) | 59.7 (2107/3529) |  |  |
| Others**†** | 7.4 (19/257) | 1.2 (44/3529) |  |  |
| Gn* dosage, median (IQR), U | 3150  (2537.5, 3750) | 2100  (1575, 2850) | 12.55 | ＜0.001 |
| Gn duration, median (IQR), day | 11 (9, 12) | 11 (10, 12) | -0.77 | 0.442 |
| Protocol of Endometrial Preparation, percentage(No./N) |  |  | 2.57 | 0.276 |
| Natural cycle | 57.2 (147/257) | 56.9 (2008/3529) |  |  |
| Artificial cycle | 33.1 (85/257) | 30.3 (1068/3529) |  |  |
| Ovarian stimulation cycle | 9.3 (24/257) | 12.5 (441/3529) |  |  |
| ICSI*, percentage(No./N) | 31.5 (81/257) | 44.7 (1577/3529) | 16.35 | ＜0.001 |
| Cleavage stage embryo, percentage(No./N) | 69.6 (179/257) | 65.2 (2302/3529) | 1.88 | 0.17 |
| Blastocysts, percentage(No./N) | 68.5 (176/257) | 65.8 (2322/3529) | 0.64 | 0.426 |
| Miscarriage, percentage(No./N) | 16.3 (42/257) | 15.7 (553/3529) | 0.04 | 0.844 |
| Early Miscarriage, percentage(No./N) | 14.0 (36/257) | 13.4 (472/3529) | 0.04 | 0.847 |
| Late Miscarriage,  percentage(No./N) | 2.3 (6/257) | 2.3 (80/3529) | ＜0.01 | 1 |

*Abbreviations: IQR, interquartile range; BMI, body mass index; FSH, follicle-stimulating hormone; AFC, antral follicle counting; IVF, in vitro fertilization; COS, controlled ovarian stimulation; GnRH, gonadotropin-releasing hormone; Gn, gonadotropin; ICSI, intracytoplasmic sperm injection

**†**Others include the short protocol, the micro-stimulation protocol and the luteal-phase ovulation induction protocol

**‡**Group 11: women aged ＜35 with low level of AMH (＜1.00 ng/ml) and following frozen-thawed embryo transfer

Group 12: women aged ＜35 with normal level of AMH (≥1.00 ng/ml) and following frozen-thawed embryo transfer
